# Supplementary material for: Genome resolved analysis of a premature infant gut microbial community reveals a Varibaculum cambriense genome and a shift towards fermentation-based metabolism during the third week of life
Source: PubMed Central journal article supplement (PMC4177395; doi:10.1186/2049-2618-1-30), 2013-12-17
Supplement: 2049-2618-1-30-S2.pdf [file 2049-2618-1-30-S2.pdf]

# Supplemental Figures

## Supplemental Figure 1 - ESOM Showing Best Blast Hit of Scaffolds

ESOM showing the clustering of *de novo* assembled metagenomic data. Each point represents a fragment of an assembled scaffold. Clustering of data points is based on the time series abundance pattern of each assembled scaffold. Dark lines between clusters show definitive separation of genome bins. Data points are colored based on the best BLAST hit of each scaffold compared against the NCBI NT database (coloring is independent of the assembly and binning).

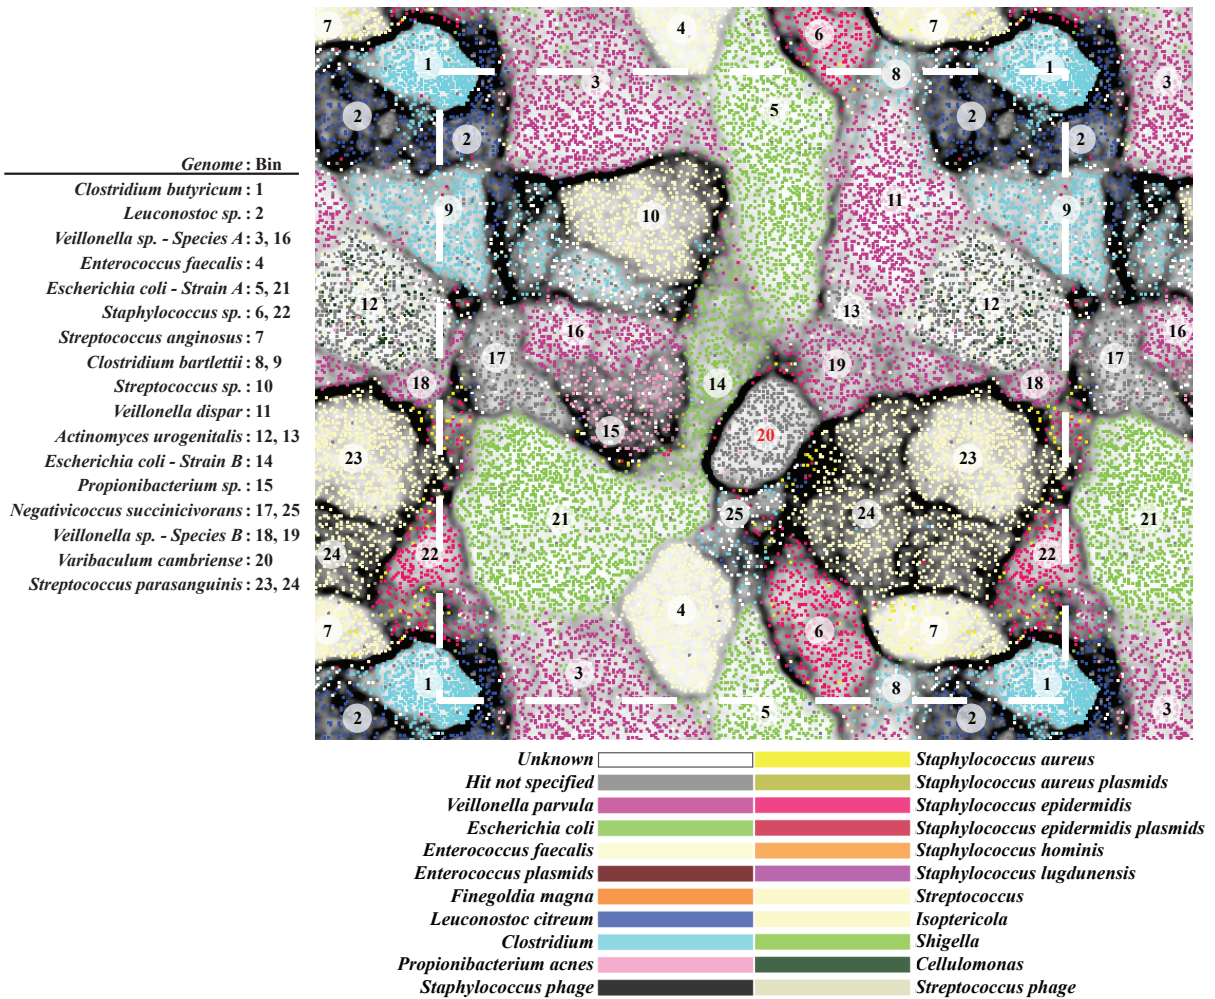

## Supplemental Figure 2 - Phylogeny of EMIRGE 16S rRNA Genes

Reconstructed 16S rRNA gene sequences were aligned along with sequences from their closest relatives in addition to species previously identified in the infant gut. Sequences were aligned with PyNAST using the GreenGenes {DeSantis:2006ii} alignment of OTUs classified at 97% sequence similarity as a template. The phylogenetic tree was constructed with FastTree2 using the generalized time-reversible model for nucleotide evolution and the CAT approximation. Local support values were calculated with the Shimodaira-Hasegawa test. The tree was rooted with the 16S sequence for *Halobacterium salinarum* and formatted using FigTree. Sequences reconstructed with EMIRGE from the microbial community are shown in blue, and reference sequences with an associated sequenced genome are shown in red.

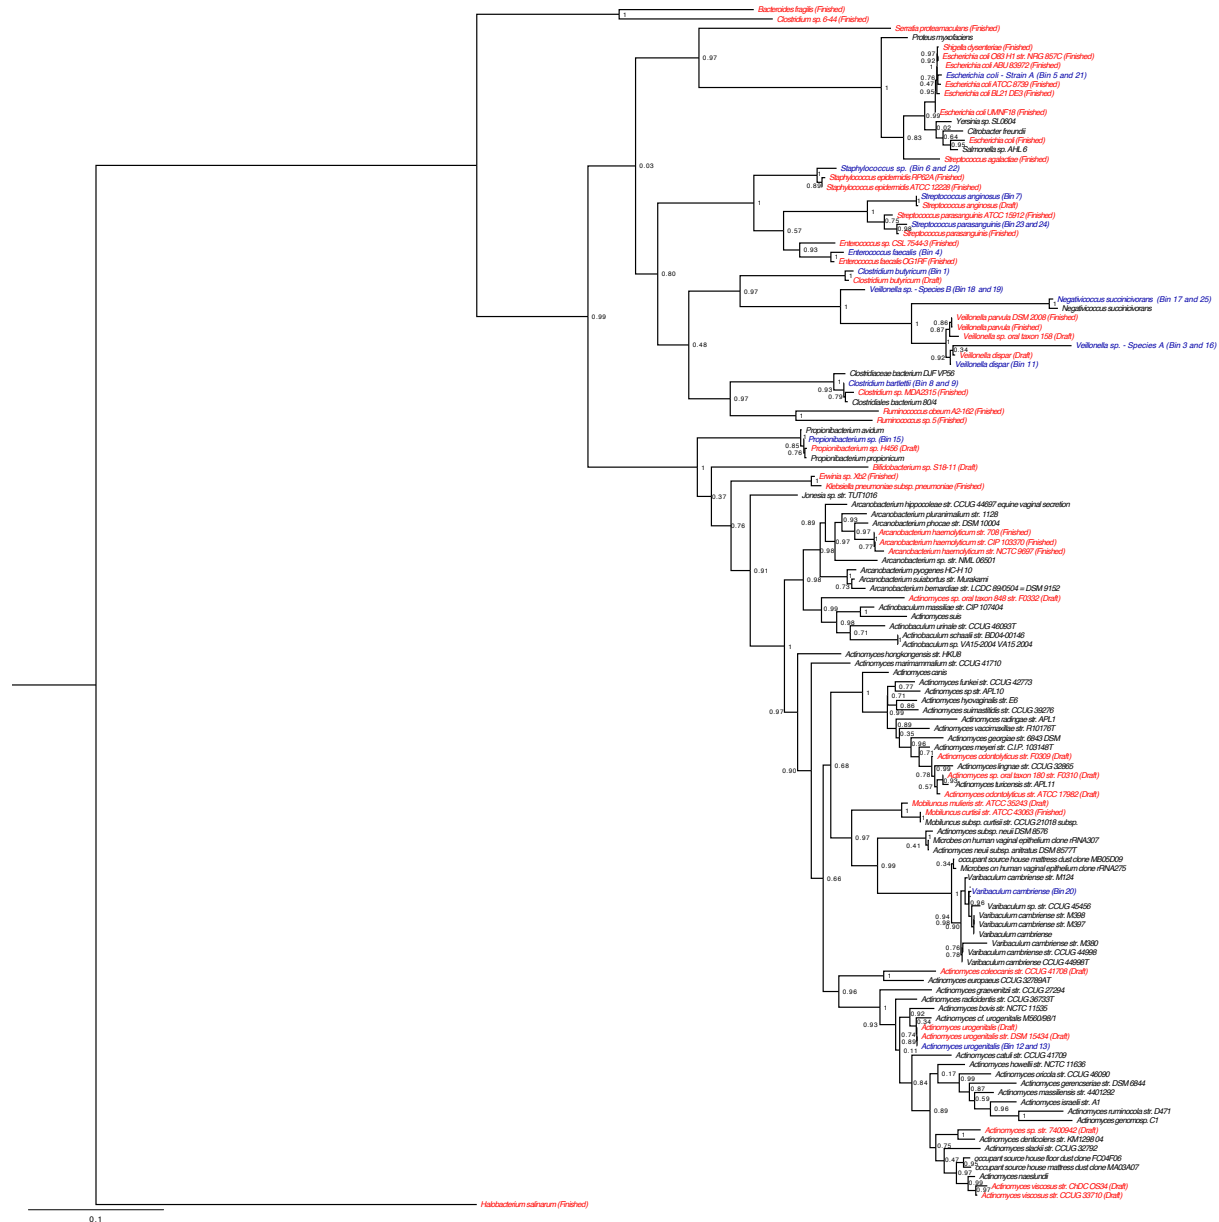

### Supplemental Figure 3 - Phylogeny of Plasmid Replication Protein Genes

Plasmid novelty and diversity represented by plasmid replication proteins. Protein sequences were aligned using MUSCLE and the phylogenetic tree was constructed using FastTree2 with the Jones-Taylor-Thornton model of amino acid evolution and the CAT approximation. Local support values were calculated with the Shimodaira-Hasegawa test. Sequences from plasmids reconstructed from the microbial community are shown in red.

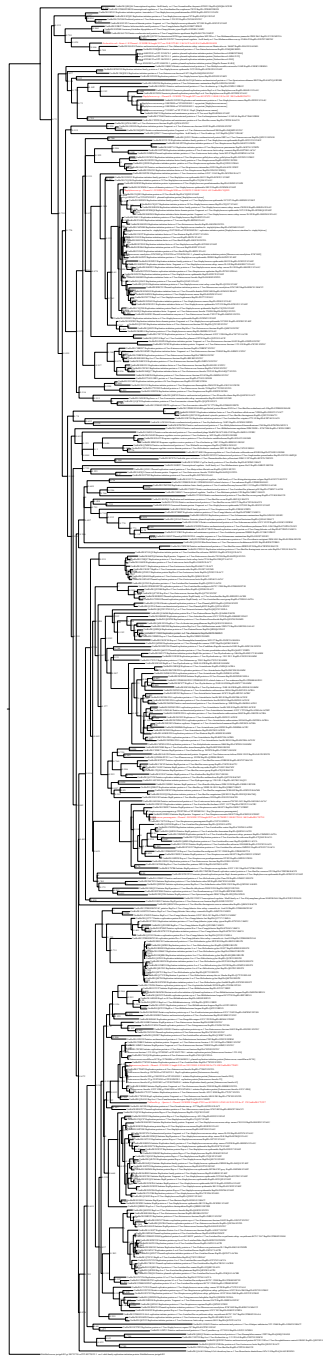

### Supplemental Figure 4 - Phylogenetic Analysis of the Catalytic Subunits of the Nitrate Reductase and Dimethyl Sulfoxide (DMSO) Reductase Superfamilies

Genes newly assigned to the nitrate reductase and DMSO reductase superfamilies (this study) are shown in red.

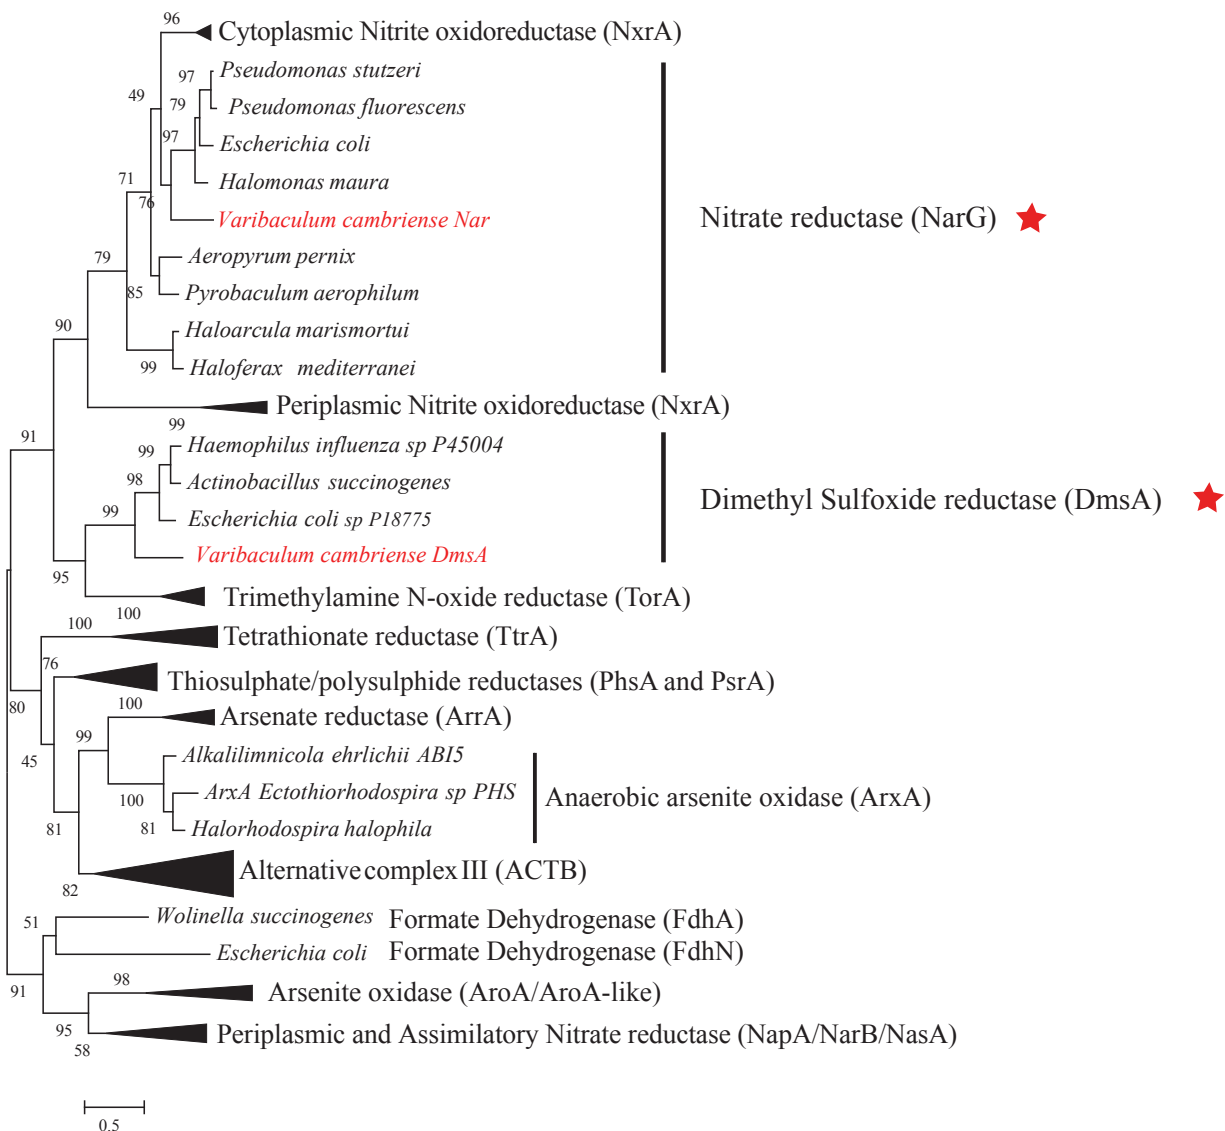

## Supplemental Figure 5 - Relative Abundance of *Varibaculum* in Human Microbiome Project Data

The relative abundance of *Varibaculum* was determined for each sample analyzed by the Human Microbiome Project. These samples were characterized by sequencing the V13 (a) and V35 (b) regions of the 16S rRNA gene.

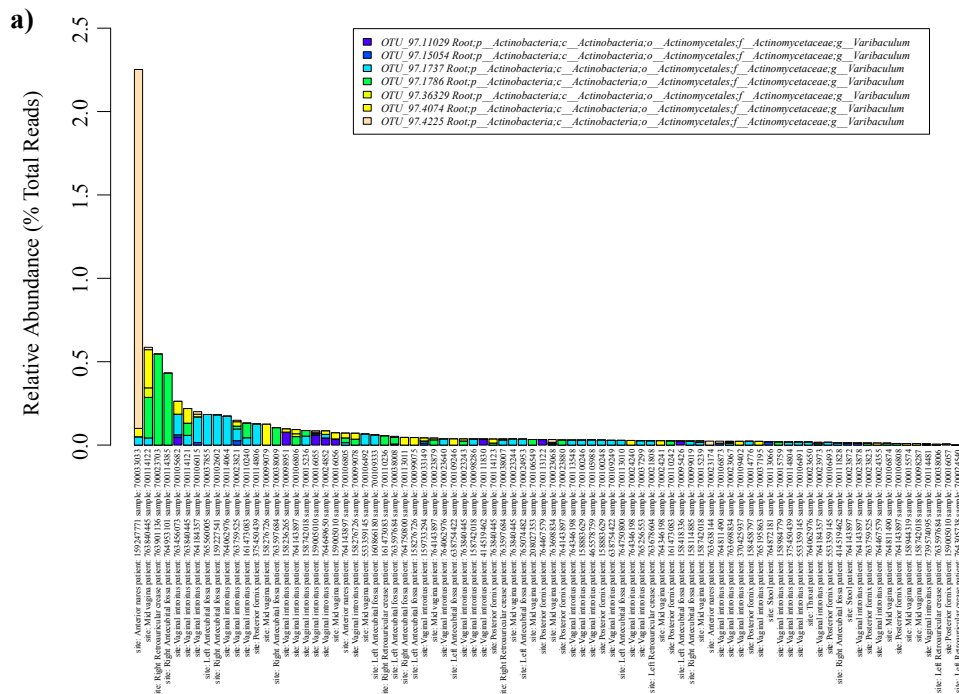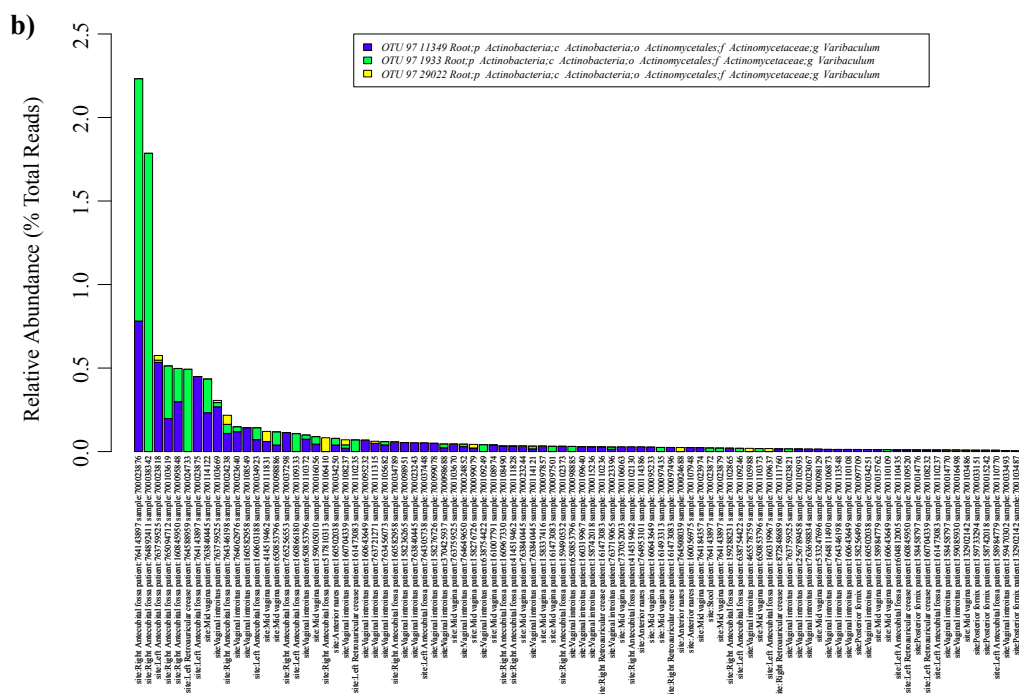

# Supplemental Tables

## Supplemental Table 1 - ESOM bins.

Assembly and classification of scaffolds clustered into bins using an ESOM. Each bin was compared to a sequenced microbial genome by identifying orthologs. Orthologs were identified by finding reciprocal best hits from pair-wise protein sequence searches between each bin and the genome of a sequenced relative.

| Genome                                | Bin       | Phylum                | Bin Size (bp)       | Bin Coverage  | N50            | Number of ORFs | Predicted % Single Copy Genes | Closest Relative with Sequenced Genome                 | Closest Relative Genome Size (bp) | % ORFs Orthologous to Reference | Average % AA ID of Orthologs |
|---------------------------------------|-----------|-----------------------|---------------------|---------------|----------------|----------------|-------------------------------|--------------------------------------------------------|-----------------------------------|---------------------------------|------------------------------|
| <i>Actinomyces urogenitalis</i>       | 13        | Actinobacteria        | 116,128.00          | 1,982.48      | 2,487          | 156            | 3.70                          | <i>Actinomyces urogenitalis</i> DSM 15434 uid55459     | 2,702,812                         | 51.92                           | 94.34                        |
| <i>Escherichia coli - Strain A</i>    | 5         | Proteobacteria        | 1,704,074.00        | 1,829.54      | 3,509          | 2,503          | 11.11                         | <i>Escherichia coli</i> S88 uid62979                   | 5,032,268                         | 55.21                           | 95.00                        |
| <i>Streptococcus anginosus</i>        | 7         | Firmicutes            | 2,108,491.00        | 1,714.41      | 537,826        | 2,252          | 100.00                        | <i>Streptococcus anginosus</i> 1 2 62CV uid62163       | 1,821,055                         | 67.67                           | 95.22                        |
| <i>Escherichia coli - Strain A</i>    | 21        | Proteobacteria        | 3,962,046.00        | 1,563.00      | 6,305          | 4,906          | 37.04                         | <i>Escherichia coli</i> S88 uid62979                   | 5,032,268                         | 60.44                           | 97.38                        |
| <i>Veillonella dispar</i>             | 11        | Firmicutes            | 2,445,194.00        | 1,331.29      | 53,688         | 2,693          | 100.00                        | <i>Veillonella dispar</i> ATCC 17748 uid55331          | 2,118,767                         | 60.04                           | 91.57                        |
| <i>Clostridium butyricum</i>          | 1         | Firmicutes            | 4,350,784.00        | 724.59        | 103,127        | 4,094          | 100.00                        | <i>Clostridium butyricum</i> 5521 uid54843             | 4,540,699                         | 73.47                           | 96.52                        |
| <i>Actinomyces urogenitalis</i>       | 12        | Actinobacteria        | 2,491,825.00        | 704.73        | 3,400          | 2,883          | 92.59                         | <i>Actinomyces urogenitalis</i> DSM 15434 uid55459     | 2,702,812                         | 69.48                           | 98.64                        |
| <i>Veillonella sp. - Species A</i>    | 3         | Firmicutes            | 2,173,194.00        | 373.08        | 4,666          | 2,727          | 37.04                         | <i>Veillonella oral taxon</i> 158 F0412 uid61047       | 2,176,752                         | 56.33                           | 92.59                        |
| <i>Enterococcus faecalis</i>          | 4         | Firmicutes            | 2,960,721.00        | 255.03        | 235,714        | 2,906          | 100.00                        | <i>Enterococcus faecalis</i> OG1RF uid54927            | 2,739,625                         | 79.11                           | 98.82                        |
| <i>Veillonella sp. - Species A</i>    | 16        | Firmicutes            | 539,200.00          | 230.21        | 3,983          | 756            | 7.41                          | <i>Veillonella dispar</i> ATCC 17748 uid55331          | 2,118,767                         | 64.29                           | 92.45                        |
| <i>Escherichia coli - Strain B</i>    | 14        | Proteobacteria        | 641,540.00          | 207.93        | 4,041          | 883            | 3.70                          | <i>Escherichia coli</i> S88 uid62979                   | 5,032,268                         | 52.66                           | 82.25                        |
| <i>Veillonella sp. - Species B</i>    | 18        | Firmicutes            | 109,076.00          | 158.19        | 1,316          | 174            | 22.22                         | <i>Veillonella dispar</i> ATCC 17748 uid55331          | 2,118,767                         | 79.31                           | 91.53                        |
| <b><i>Varibaculum cambriense</i></b>  | <b>20</b> | <b>Actinobacteria</b> | <b>2,247,641.00</b> | <b>122.51</b> | <b>240,417</b> | <b>1,954</b>   | <b>100.00</b>                 | <b><i>Mobiluncus mulieris</i> ATCC 35239 uid52345</b>  | <b>2,533,633</b>                  | <b>58.19</b>                    | <b>53.79</b>                 |
| <i>Staphylococcus sp.</i>             | 22        | Firmicutes            | 490,354.00          | 75.43         | 7,348          | 564            | 18.52                         | <i>Staphylococcus epidermidis</i> ATCC 12228 uid57861  | 2,499,279                         | 74.82                           | 94.85                        |
| <i>Veillonella sp. - Species B</i>    | 19        | Firmicutes            | 530,104.00          | 75.38         | 2,283          | 705            | 7.41                          | <i>Veillonella dispar</i> ATCC 17748 uid55331          | 2,118,767                         | 63.12                           | 85.29                        |
| <i>Clostridium bartlettii</i>         | 9         | Firmicutes            | 2,444,327.00        | 60.98         | 12,184         | 2,342          | 92.59                         | <i>Clostridium bartlettii</i> DSM 16795 uid54809       | 2,972,256                         | 89.03                           | 98.53                        |
| <i>Clostridium bartlettii</i>         | 8         | Firmicutes            | 241,119.00          | 66.99         | 17,901         | 291            | 0.00                          | <i>Clostridium bartlettii</i> DSM 16795 uid54809       | 2,972,256                         | 51.20                           | 64.62                        |
| <i>Negativococcus succinicivorans</i> | 17        | Negativococcus        | 1,341,981.00        | 33.59         | 17,543         | 1,448          | 100.00                        | <i>Bacillus coagulans</i> 36D1 uid54335                | 3,552,226                         | 50.28                           | 43.78                        |
| <i>Negativococcus succinicivorans</i> | 25        | Negativococcus        | 166,917.00          | 32.97         | 1,766          | 238            | 3.70                          | <i>Bacillus coagulans</i> 36D1 uid54335                | 3,552,226                         | 23.11                           | 36.62                        |
| <i>Streptococcus parasanguinis</i>    | 23        | Firmicutes            | 2,017,810.00        | 32.00         | 5,231          | 2,366          | 77.78                         | <i>Streptococcus parasanguinis</i> ATCC 15912 uid49313 | 2,153,652                         | 68.43                           | 94.96                        |
| <i>Staphylococcus sp.</i>             | 6         | Firmicutes            | 1,039,864.00        | 31.23         | 10,033         | 1,102          | 18.52                         | <i>Staphylococcus epidermidis</i> ATCC 12228 uid57861  | 2,499,279                         | 84.94                           | 98.43                        |
| <i>Propionibacterium sp.</i>          | 15        | Propionibacterium     | 336,576.00          | 22.16         | 1,117          | 565            | 18.52                         | <i>Propionibacterium</i> 5 U 42AF0A uid75117           | 2,532,807                         | 46.37                           | 82.40                        |
| <i>Leuconostoc sp.</i>                | 2         | Firmicutes            | 566,369.00          | 19.44         | 1,603          | 874            | 25.93                         | <i>Leuconostoc citreum</i> KM20 uid58481               | 1,796,284                         | 66.70                           | 96.03                        |
| <i>Streptococcus sp.</i>              | 10        | Firmicutes            | 1,915,777.00        | 16.17         | 11,008         | 2,114          | 55.56                         | <i>Streptococcus</i> M334 uid62529                     | 2,207,013                         | 67.64                           | 93.88                        |
| <i>Streptococcus parasanguinis</i>    | 24        | Firmicutes            | 829,730.00          | 8.19          | 1,343          | 1,318          | 14.81                         | <i>Streptococcus parasanguinis</i> ATCC 15912 uid49313 | 2,153,652                         | 59.03                           | 70.58                        |

## Supplemental Table 2 - Absolute abundance of reconstructed genomes.

Percent of total reads used in the metagenome assembly that could be mapped to reconstructed genomes at each time point and as a total.

| Genome                                           | DOL 14 | DOL 15 | DOL 15 | DOL 18 | DOL 18 | DOL 19 | DOL 19 | DOL 20 | DOL 20 | Total  |
|--------------------------------------------------|--------|--------|--------|--------|--------|--------|--------|--------|--------|--------|
| <i>Escherichia coli - Strain A</i>               | 58.860 | 44.566 | 36.751 | 29.765 | 17.912 | 22.821 | 26.512 | 33.088 | 36.597 | 33.447 |
| <i>Unassembled and Unbinned</i>                  | 18.582 | 16.636 | 16.092 | 13.071 | 10.374 | 12.357 | 12.489 | 13.682 | 14.552 | 14.012 |
| <i>Streptococcus anginosus</i>                   | 0.044  | 0.197  | 0.206  | 20.935 | 15.970 | 21.174 | 19.276 | 20.431 | 15.224 | 13.016 |
| <i>Veillonella dispar</i>                        | 4.596  | 10.642 | 13.491 | 14.499 | 7.331  | 15.952 | 17.137 | 12.572 | 11.219 | 11.722 |
| <i>Clostridium butyricum</i>                     | 0.092  | 4.917  | 9.954  | 5.376  | 39.871 | 14.426 | 9.686  | 3.120  | 4.781  | 11.352 |
| <i>Actinomyces urogenitalis</i>                  | 2.283  | 6.018  | 9.913  | 8.936  | 3.681  | 7.049  | 8.455  | 9.991  | 9.811  | 7.135  |
| <i>Veillonella sp. - Species A</i>               | 7.836  | 6.820  | 6.841  | 1.621  | 1.076  | 1.247  | 1.444  | 1.949  | 2.306  | 3.298  |
| <i>Enterococcus faecalis</i>                     | 4.844  | 4.937  | 3.321  | 2.175  | 1.443  | 2.491  | 2.318  | 1.799  | 1.609  | 2.719  |
| <i>Varibaculum cambriense</i>                    | 0.071  | 1.638  | 0.387  | 1.942  | 1.067  | 0.579  | 0.887  | 1.143  | 0.898  | 0.992  |
| <i>Clostridium bartlettii</i>                    | 0.409  | 0.794  | 0.972  | 0.582  | 0.458  | 0.760  | 0.618  | 0.406  | 0.405  | 0.586  |
| <i>Escherichia coli - Strain B</i>               | 0.608  | 0.717  | 0.295  | 0.143  | 0.159  | 0.131  | 0.121  | 0.204  | 0.178  | 0.281  |
| <i>Veillonella sp. - Species B</i>               | 0.111  | 0.181  | 0.205  | 0.240  | 0.104  | 0.201  | 0.220  | 0.328  | 0.305  | 0.206  |
| <i>Streptococcus parasanguinis</i>               | 0.006  | 0.016  | 0.016  | 0.053  | 0.025  | 0.133  | 0.180  | 0.497  | 1.014  | 0.205  |
| <i>Negativococcus succinicivorans</i>            | 0.457  | 0.324  | 0.290  | 0.111  | 0.077  | 0.113  | 0.143  | 0.087  | 0.091  | 0.182  |
| <i>Staphylococcus sp.</i>                        | 0.114  | 0.166  | 0.116  | 0.173  | 0.140  | 0.193  | 0.108  | 0.223  | 0.252  | 0.164  |
| <i>Escherichia coli - Strain A / B - Plasmid</i> | 0.352  | 0.304  | 0.159  | 0.114  | 0.075  | 0.118  | 0.107  | 0.117  | 0.133  | 0.162  |
| <i>Streptococcus sp.</i>                         | 0.026  | 0.419  | 0.429  | 0.022  | 0.012  | 0.041  | 0.019  | 0.043  | 0.093  | 0.112  |
| <i>Veillonella sp. - Species A - Phage</i>       | 0.102  | 0.096  | 0.102  | 0.054  | 0.034  | 0.042  | 0.066  | 0.101  | 0.204  | 0.086  |
| <i>Escherichia coli - Strain A - Phage</i>       | 0.139  | 0.107  | 0.084  | 0.069  | 0.048  | 0.057  | 0.064  | 0.068  | 0.077  | 0.078  |
| <i>Veillonella sp. - Species A - Plasmid</i>     | 0.242  | 0.226  | 0.139  | 0.009  | 0.005  | 0.008  | 0.006  | 0.006  | 0.007  | 0.069  |
| <i>Veillonella sp. - Species B - Phage</i>       | 0.038  | 0.036  | 0.035  | 0.003  | 0.021  | 0.027  | 0.048  | 0.068  | 0.140  | 0.048  |
| <i>Leuconostoc sp.</i>                           | 0.028  | 0.048  | 0.093  | 0.017  | 0.078  | 0.019  | 0.035  | 0.006  | 0.031  | 0.040  |
| <i>Enterococcus faecalis - Plasmid</i>           | 0.060  | 0.106  | 0.037  | 0.025  | 0.016  | 0.029  | 0.025  | 0.025  | 0.019  | 0.038  |
| <i>Propionibacterium sp.</i>                     | 0.088  | 0.065  | 0.046  | 0.011  | 0.009  | 0.007  | 0.007  | 0.008  | 0.010  | 0.027  |
| <i>Actinomyces urogenitalis - Phage</i>          | 0.006  | 0.018  | 0.023  | 0.019  | 0.010  | 0.017  | 0.022  | 0.023  | 0.022  | 0.017  |
| <i>Streptococcus parasanguinis - Plasmid</i>     | 0.000  | 0.000  | 0.000  | 0.000  | 0.000  | 0.002  | 0.003  | 0.010  | 0.016  | 0.003  |
| <i>Staphylococcus sp. - Plasmid B</i>            | 0.002  | 0.003  | 0.001  | 0.001  | 0.001  | 0.002  | 0.001  | 0.003  | 0.004  | 0.002  |
| <i>Staphylococcus sp. - Plasmid A</i>            | 0.002  | 0.003  | 0.001  | 0.001  | 0.001  | 0.001  | 0.001  | 0.002  | 0.003  | 0.002  |
| <i>Staphylococcus sp. - Phage</i>                | 0.002  | 0.001  | 0.001  | 0.002  | 0.002  | 0.001  | 0.001  | 0.001  | 0.001  | 0.001  |

### Supplemental Table 3 - Coverage of reconstructed genomes.

Coverage of reconstructed genomes at each time point and as a total.

| Genome                                           | DOL 14   | DOL 15   | DOL 15   | DOL 18   | DOL 18 | DOL 19   | DOL 19   | DOL 20   | DOL 20   | Total     |
|--------------------------------------------------|----------|----------|----------|----------|--------|----------|----------|----------|----------|-----------|
| <i>Escherichia coli - Strain A / B - Plasmid</i> | 3,310.53 | 3,006.34 | 1,139.91 | 1,148.89 | 958.28 | 1,041.67 | 1,026.07 | 1,127.07 | 1,150.90 | 13,909.65 |
| <i>Escherichia coli - Strain A - Phage</i>       | 1,074.53 | 866.54   | 496.74   | 574.85   | 506.76 | 413.92   | 504.95   | 541.55   | 550.77   | 5,530.63  |
| <i>Enterococcus faecalis - Plasmid</i>           | 347.35   | 645.56   | 165.90   | 157.22   | 126.40 | 158.52   | 147.64   | 147.28   | 101.04   | 1,996.92  |
| <i>Streptococcus anginosus</i>                   | 0.63     | 2.97     | 2.26     | 323.78   | 312.81 | 285.34   | 282.81   | 301.64   | 202.17   | 1,714.41  |
| <i>Escherichia coli - Strain A</i>               | 315.09   | 250.71   | 150.33   | 171.42   | 130.65 | 114.52   | 144.85   | 181.91   | 180.98   | 1,640.47  |
| <i>Actinomyces urogenitalis - Phage</i>          | 57.29    | 186.51   | 177.61   | 210.95   | 142.71 | 164.47   | 232.03   | 237.30   | 208.64   | 1,617.51  |
| <i>Veillonella dispar</i>                        | 56.97    | 138.64   | 127.79   | 193.36   | 123.83 | 185.37   | 216.81   | 160.05   | 128.47   | 1,331.29  |
| <i>Veillonella sp. - Species A - Phage</i>       | 151.54   | 149.00   | 115.57   | 86.39    | 68.37  | 58.96    | 100.50   | 154.19   | 279.74   | 1,164.27  |
| <i>Veillonella sp. - Species B - Phage</i>       | 69.35    | 69.17    | 48.50    | 69.94    | 52.17  | 46.84    | 88.93    | 128.20   | 237.07   | 810.17    |
| <i>Actinomyces urogenitalis</i>                  | 26.56    | 73.59    | 88.14    | 111.86   | 58.35  | 76.88    | 100.41   | 119.40   | 105.45   | 760.65    |
| <i>Clostridium butyricum</i>                     | 0.64     | 36.00    | 52.99    | 40.30    | 378.49 | 94.21    | 68.87    | 22.32    | 30.77    | 724.59    |
| <i>Veillonella sp. - Species A - Plasmid</i>     | 154.11   | 151.29   | 67.74    | 5.89     | 4.57   | 4.57     | 3.76     | 4.02     | 3.95     | 399.91    |
| <i>Veillonella sp. - Species A</i>               | 89.13    | 81.53    | 59.46    | 19.83    | 16.67  | 13.30    | 16.77    | 22.77    | 24.24    | 343.69    |
| <i>Enterococcus faecalis</i>                     | 49.59    | 53.11    | 25.98    | 23.96    | 20.13  | 23.91    | 24.22    | 18.92    | 15.22    | 255.03    |
| <i>Staphylococcus sp. - Plasmid B</i>            | 27.47    | 40.68    | 12.85    | 12.42    | 19.30  | 20.04    | 14.18    | 31.35    | 39.36    | 217.65    |
| <i>Staphylococcus sp. - Plasmid A</i>            | 28.46    | 31.18    | 7.79     | 11.22    | 12.01  | 15.54    | 17.04    | 23.88    | 33.56    | 180.68    |
| <i>Staphylococcus sp. - Phage</i>                | 19.83    | 17.89    | 10.31    | 21.14    | 27.86  | 9.33     | 8.39     | 10.60    | 14.48    | 139.83    |
| <i>Escherichia coli - Strain B</i>               | 29.11    | 36.07    | 10.78    | 7.36     | 10.39  | 5.87     | 5.91     | 10.01    | 7.85     | 123.35    |
| <i>Varibaculum cambriense</i>                    | 0.96     | 23.22    | 3.99     | 28.18    | 19.62  | 7.32     | 12.21    | 15.83    | 11.18    | 122.51    |
| <i>Streptococcus parasanguinis - Plasmid</i>     | 0.01     | 0.04     | 0.09     | 1.70     | 1.16   | 7.64     | 10.92    | 33.18    | 50.03    | 104.78    |
| <i>Veillonella sp. - Species B</i>               | 5.25     | 9.01     | 7.44     | 12.24    | 6.72   | 8.94     | 10.63    | 15.95    | 13.35    | 89.51     |
| <i>Clostridium bartlettii</i>                    | 4.62     | 9.42     | 8.38     | 7.07     | 7.04   | 8.04     | 7.12     | 4.71     | 4.22     | 60.62     |
| <i>Negativococcus succinicivorans</i>            | 9.18     | 6.84     | 4.45     | 2.41     | 2.10   | 2.12     | 2.93     | 1.79     | 1.69     | 33.52     |
| <i>Staphylococcus sp.</i>                        | 2.28     | 3.50     | 1.77     | 3.73     | 3.83   | 3.64     | 2.21     | 4.61     | 4.67     | 30.23     |
| <i>Propionibacterium sp.</i>                     | 7.95     | 6.18     | 3.16     | 1.09     | 1.05   | 0.58     | 0.60     | 0.73     | 0.82     | 22.16     |
| <i>Streptococcus parasanguinis</i>               | 0.07     | 0.18     | 0.13     | 0.61     | 0.36   | 1.34     | 1.97     | 5.48     | 10.07    | 20.21     |
| <i>Leuconostoc sp.</i>                           | 1.52     | 2.69     | 3.82     | 0.96     | 5.72   | 0.95     | 1.93     | 0.31     | 1.54     | 19.44     |
| <i>Streptococcus sp.</i>                         | 0.42     | 6.97     | 5.18     | 0.38     | 0.26   | 0.61     | 0.31     | 0.70     | 1.35     | 16.17     |

### Supplemental Table 4 - Relative abundance of reconstructed genomes.

Relative abundance of reconstructed genomes at each time point and as a total.

| Genome                                           | DOL 14 | DOL 15 | DOL 15 | DOL 18 | DOL 18 | DOL 19 | DOL 19 | DOL 20 | DOL 20 | Total |
|--------------------------------------------------|--------|--------|--------|--------|--------|--------|--------|--------|--------|-------|
| <i>Escherichia coli - Strain A / B - Plasmid</i> | 56.68  | 50.91  | 40.72  | 35.36  | 31.76  | 37.54  | 33.59  | 33.89  | 33.72  | 41.67 |
| <i>Escherichia coli - Strain A - Phage</i>       | 18.40  | 14.68  | 17.75  | 17.69  | 16.79  | 14.92  | 16.53  | 16.28  | 16.13  | 16.57 |
| <i>Enterococcus faecalis - Plasmid</i>           | 5.95   | 10.93  | 5.93   | 4.84   | 4.19   | 5.71   | 4.83   | 4.43   | 2.96   | 5.98  |
| <i>Streptococcus anginosus</i>                   | 0.01   | 0.05   | 0.08   | 9.97   | 10.37  | 10.28  | 9.26   | 9.07   | 5.92   | 5.14  |
| <i>Escherichia coli - Strain A</i>               | 5.39   | 4.25   | 5.37   | 5.28   | 4.33   | 4.13   | 4.74   | 5.47   | 5.30   | 4.91  |
| <i>Actinomyces urogenitalis - Phage</i>          | 0.98   | 3.16   | 6.35   | 6.49   | 4.73   | 5.93   | 7.60   | 7.14   | 6.11   | 4.85  |
| <i>Veillonella dispar</i>                        | 0.98   | 2.35   | 4.57   | 5.95   | 4.10   | 6.68   | 7.10   | 4.81   | 3.76   | 3.99  |
| <i>Veillonella sp. - Species A - Phage</i>       | 2.59   | 2.52   | 4.13   | 2.66   | 2.27   | 2.13   | 3.29   | 4.64   | 8.19   | 3.49  |
| <i>Veillonella sp. - Species B - Phage</i>       | 1.19   | 1.17   | 1.73   | 2.15   | 1.73   | 1.69   | 2.91   | 3.85   | 6.94   | 2.43  |
| <i>Actinomyces urogenitalis</i>                  | 0.45   | 1.25   | 3.15   | 3.44   | 1.93   | 2.77   | 3.29   | 3.59   | 3.09   | 2.28  |
| <i>Clostridium butyricum</i>                     | 0.01   | 0.61   | 1.89   | 1.24   | 12.54  | 3.40   | 2.25   | 0.67   | 0.90   | 2.17  |
| <i>Veillonella sp. - Species A - Plasmid</i>     | 2.64   | 2.56   | 2.42   | 0.18   | 0.15   | 0.16   | 0.12   | 0.12   | 0.12   | 1.20  |
| <i>Veillonella sp. - Species A</i>               | 1.53   | 1.38   | 2.12   | 0.61   | 0.55   | 0.48   | 0.55   | 0.68   | 0.71   | 1.03  |
| <i>Enterococcus faecalis</i>                     | 0.85   | 0.90   | 0.93   | 0.74   | 0.67   | 0.86   | 0.79   | 0.57   | 0.45   | 0.76  |
| <i>Staphylococcus sp. - Plasmid B</i>            | 0.47   | 0.69   | 0.46   | 0.38   | 0.64   | 0.72   | 0.46   | 0.94   | 1.15   | 0.65  |
| <i>Staphylococcus sp. - Plasmid A</i>            | 0.49   | 0.53   | 0.28   | 0.35   | 0.40   | 0.56   | 0.56   | 0.72   | 0.98   | 0.54  |
| <i>Staphylococcus sp. - Phage</i>                | 0.34   | 0.30   | 0.37   | 0.65   | 0.92   | 0.34   | 0.27   | 0.32   | 0.42   | 0.42  |
| <i>Escherichia coli - Strain B</i>               | 0.50   | 0.61   | 0.39   | 0.23   | 0.34   | 0.21   | 0.19   | 0.30   | 0.23   | 0.37  |
| <i>Varibaculum cambriense</i>                    | 0.02   | 0.39   | 0.14   | 0.87   | 0.65   | 0.26   | 0.40   | 0.48   | 0.33   | 0.37  |
| <i>Streptococcus parasanguinis - Plasmid</i>     | 0.00   | 0.00   | 0.00   | 0.05   | 0.04   | 0.28   | 0.36   | 1.00   | 1.47   | 0.31  |
| <i>Veillonella sp. - Species B</i>               | 0.09   | 0.15   | 0.27   | 0.38   | 0.22   | 0.32   | 0.35   | 0.48   | 0.39   | 0.27  |
| <i>Clostridium bartlettii</i>                    | 0.08   | 0.16   | 0.30   | 0.22   | 0.23   | 0.29   | 0.23   | 0.14   | 0.12   | 0.18  |
| <i>Negativococcus succinicivorans</i>            | 0.16   | 0.12   | 0.16   | 0.07   | 0.07   | 0.08   | 0.10   | 0.05   | 0.05   | 0.10  |
| <i>Staphylococcus sp.</i>                        | 0.04   | 0.06   | 0.06   | 0.11   | 0.13   | 0.13   | 0.07   | 0.14   | 0.14   | 0.09  |
| <i>Propionibacterium sp.</i>                     | 0.14   | 0.10   | 0.11   | 0.03   | 0.03   | 0.02   | 0.02   | 0.02   | 0.02   | 0.07  |
| <i>Streptococcus parasanguinis</i>               | 0.00   | 0.00   | 0.00   | 0.02   | 0.01   | 0.05   | 0.06   | 0.16   | 0.29   | 0.06  |
| <i>Leuconostoc sp.</i>                           | 0.03   | 0.05   | 0.14   | 0.03   | 0.19   | 0.03   | 0.06   | 0.01   | 0.05   | 0.06  |
| <i>Streptococcus sp.</i>                         | 0.01   | 0.12   | 0.19   | 0.01   | 0.01   | 0.02   | 0.01   | 0.02   | 0.04   | 0.05  |

## Supplemental Table 5 - Relative abundance of bacterial genomes.

Relative abundance of reconstructed bacterial genomes at each time point and as a total.

| Genome                                | DOL 14 | DOL 15 | DOL 15 | DOL 18 | DOL 18 | DOL 19 | DOL 19 | DOL 20 | DOL 20 | Total |
|---------------------------------------|--------|--------|--------|--------|--------|--------|--------|--------|--------|-------|
| <i>Streptococcus anginosus</i>        | 0.10   | 0.40   | 0.41   | 34.13  | 28.49  | 34.26  | 31.40  | 34.00  | 27.17  | 23.46 |
| <i>Escherichia coli - Strain A</i>    | 52.52  | 33.85  | 27.04  | 18.07  | 11.90  | 13.75  | 16.08  | 20.51  | 24.32  | 22.45 |
| <i>Veillonella dispar</i>             | 9.50   | 18.72  | 22.98  | 20.39  | 11.28  | 22.25  | 24.08  | 18.04  | 17.27  | 18.22 |
| <i>Actinomyces urogenitalis</i>       | 4.43   | 9.94   | 15.85  | 11.79  | 5.31   | 9.23   | 11.15  | 13.46  | 14.17  | 10.41 |
| <i>Clostridium butyricum</i>          | 0.11   | 4.86   | 9.53   | 4.25   | 34.47  | 11.31  | 7.65   | 2.52   | 4.14   | 9.92  |
| <i>Veillonella sp. - Species A</i>    | 14.86  | 11.01  | 10.69  | 2.09   | 1.52   | 1.60   | 1.86   | 2.57   | 3.26   | 4.70  |
| <i>Enterococcus faecalis</i>          | 8.27   | 7.17   | 4.67   | 2.53   | 1.83   | 2.87   | 2.69   | 2.13   | 2.05   | 3.49  |
| <i>Escherichia coli - Strain B</i>    | 4.85   | 4.87   | 1.94   | 0.78   | 0.95   | 0.70   | 0.66   | 1.13   | 1.06   | 1.69  |
| <i>Varibaculum cambriense</i>         | 0.16   | 3.14   | 0.72   | 2.97   | 1.79   | 0.88   | 1.36   | 1.78   | 1.50   | 1.68  |
| <i>Veillonella sp. - Species B</i>    | 0.87   | 1.22   | 1.34   | 1.29   | 0.61   | 1.07   | 1.18   | 1.80   | 1.79   | 1.22  |
| <i>Clostridium bartlettii</i>         | 0.77   | 1.27   | 1.51   | 0.75   | 0.64   | 0.97   | 0.79   | 0.53   | 0.57   | 0.83  |
| <i>Negativicoccus succinicivorans</i> | 1.53   | 0.92   | 0.80   | 0.25   | 0.19   | 0.26   | 0.33   | 0.20   | 0.23   | 0.46  |
| <i>Staphylococcus sp.</i>             | 0.38   | 0.47   | 0.32   | 0.39   | 0.35   | 0.44   | 0.25   | 0.52   | 0.63   | 0.41  |
| <i>Propionibacterium sp.</i>          | 1.33   | 0.83   | 0.57   | 0.11   | 0.10   | 0.07   | 0.07   | 0.08   | 0.11   | 0.30  |
| <i>Streptococcus parasanguinis</i>    | 0.01   | 0.02   | 0.02   | 0.06   | 0.03   | 0.16   | 0.22   | 0.62   | 1.35   | 0.28  |
| <i>Leuconostoc sp.</i>                | 0.25   | 0.36   | 0.69   | 0.10   | 0.52   | 0.11   | 0.21   | 0.04   | 0.21   | 0.27  |
| <i>Streptococcus sp.</i>              | 0.07   | 0.94   | 0.93   | 0.04   | 0.02   | 0.07   | 0.03   | 0.08   | 0.18   | 0.22  |
